# Supplementary material for: Drug-related risk of severe hypoglycaemia in observational studies: a systematic review and meta-analysis
Source: Springer Nature journal article supplement (doi:10.1186/s12902-015-0052-z), 2015-10-12
Supplement: MOESM1 [file 9753954]

## Search strategies

### 1.1 Systematic review of observational studies – primary search, 1<sup>st</sup> and 2<sup>nd</sup> update

| The Cochrane Library search strategy |                                                                                               |
|--------------------------------------|-----------------------------------------------------------------------------------------------|
| #1                                   | MeSH descriptor: [Diabetes Mellitus] explode all trees                                        |
| #2                                   | MeSH descriptor: [Hypoglycaemia] explode all trees                                            |
| #3                                   | MeSH descriptor: [Sulfonylurea Compounds] explode all trees                                   |
| #4                                   | MeSH descriptor: [Insulin] explode all trees                                                  |
| #5                                   | MeSH descriptor: [Insulins] explode all trees                                                 |
| #6                                   | diabetes [from 2002]                                                                          |
| #7                                   | hypoglycaemia [from 2002]                                                                     |
| #8                                   | sulfonylurea [from 2002]                                                                      |
| #9                                   | insulin or insulins [from 2002]                                                               |
| #10                                  | Enter terms for search (#1 or #6) and (#2 or #7) and (#3 or #8 or #4 or #5 or #9) [from 2002] |

| Medline (PubMed) search strategy |                                                                                                            |
|----------------------------------|------------------------------------------------------------------------------------------------------------|
| #1                               | diabetes                                                                                                   |
| #2                               | hypoglycaemia                                                                                              |
| #3                               | sulfonylurea                                                                                               |
| #4                               | insulin                                                                                                    |
| #5                               | insulins                                                                                                   |
| #6                               | #1 and #2 and (#3 or #4 or #5)                                                                             |
| #7                               | #6 Filters: Comment; Editorial; Guideline; Letter; Practice Guideline; Randomized Controlled Trial; Review |
| #8                               | #6 not #7                                                                                                  |
| #9                               | #8 Filters: Humans, 10 years, English                                                                      |

| EMBASE search strategy |                                                                                                              |
|------------------------|--------------------------------------------------------------------------------------------------------------|
| #1                     | 'diabetes'/syn AND ([english]/lim OR [polish]/lim) AND [humans]/lim AND [embase]/lim AND [2002-2013]/py      |
| #2                     | 'hypoglycaemia'/syn AND ([english]/lim OR [polish]/lim) AND [humans]/lim AND [embase]/lim AND [2002-2013]/py |

|     |                                                                                                             |
|-----|-------------------------------------------------------------------------------------------------------------|
| #3  | 'sulfonylurea'/syn AND ([english]/lim OR [polish]/lim) AND [humans]/lim AND [embase]/lim AND [2002-2013]/py |
| #4  | 'insulin'/syn AND ([english]/lim OR [polish]/lim) AND [humans]/lim AND [embase]/lim AND [2002-2013]/py      |
| #5  | #3 OR #4                                                                                                    |
| #6  | #1 AND #2 AND #5                                                                                            |
| #7  | 'diabetes'/syn AND [animals]/lim AND [embase]/lim AND [2002-2013]/py                                        |
| #8  | 'diabetes'/syn AND [in process]/lim AND [embase]/lim AND [2002-2013]/py                                     |
| #9  | 'diabetes'/syn AND [article in press]/lim AND [embase]/lim AND [2002-2013]/py                               |
| #10 | 'diabetes'/syn AND [randomized controlled trial]/lim AND [embase]/lim AND [2002-2013]/py                    |
| #11 | 'diabetes'/syn AND [metaanalysis]/lim AND [embase]/lim AND [2002-2013]/py                                   |
| #12 | 'diabetes'/syn AND [review]/lim AND [embase]/lim AND [2002-2013]/py                                         |
| #13 | 'diabetes'/syn AND [conference abstract]/lim AND [embase]/lim AND [2002-2013]/py                            |
| #14 | 'diabetes'/syn AND [conference paper]/lim AND [embase]/lim AND [2002-2013]/py                               |
| #15 | 'diabetes'/syn AND [conference review]/lim AND [embase]/lim AND [2002-2013]/py                              |
| #16 | 'diabetes'/syn AND [editorial]/lim AND [embase]/lim AND [2002-2013]/py                                      |
| #17 | 'diabetes'/syn AND [letter]/lim AND [embase]/lim AND [2002-2013]/py                                         |
| #18 | 'diabetes'/syn AND [note]/lim AND [embase]/lim AND [2002-2013]/py                                           |
| #19 | 'diabetes'/syn AND [cochrane review]/lim AND [embase]/lim AND [2002-2013]/py                                |
| #20 | 'diabetes'/syn AND [systematic review]/lim AND [embase]/lim AND [2002-2013]/py                              |
| #21 | #7 OR #8 OR #9 OR #10 OR #11 OR #12 OR #13 OR #14 OR #15 OR #16 OR #17 OR #18 OR #19 OR #20                 |
| #22 | #6 NOT #21                                                                                                  |

## 1.2 Systematic review of secondary studies

| The Cochrane Library search strategy |                                                        |
|--------------------------------------|--------------------------------------------------------|
| #1                                   | MeSH descriptor: [Diabetes Mellitus] explode all trees |
| #2                                   | MeSH descriptor: [Hypoglycaemia] explode all trees     |
| #3                                   | #1 and #2                                              |
| #4                                   | #3 and Cochrane Reviews                                |
| #5                                   | #3 and Other Reviews                                   |
| #6                                   | #3 and Technology Assessments                          |
| #7                                   | #3 and Economic Evaluation                             |

| <b>EMBASE search strategy</b> |                                              |
|-------------------------------|----------------------------------------------|
| #1                            | 'diabetes'/syn AND mellitus AND [embase]/lim |
| #2                            | 'hypoglycaemia'/syn AND [embase]/lim         |
| #3                            | #1 and #2                                    |
| #4                            | #3 AND 'systematic review'/de                |

| <b>Medline (PubMed) search strategy</b> |                                    |
|-----------------------------------------|------------------------------------|
| #1                                      | "Diabetes Mellitus"[Mesh]          |
| #2                                      | Diabetes Mellitus                  |
| #3                                      | #1 or #2                           |
| #4                                      | "Hypoglycaemia"[Mesh]              |
| #5                                      | Hypoglycaemia                      |
| #6                                      | #4 or #5                           |
| #7                                      | #3 and #6                          |
| #8                                      | #7 AND Filters: Systematic Reviews |

| <b>CRD (Centre for Reviews and Dissemination) search strategy</b> |                                                     |
|-------------------------------------------------------------------|-----------------------------------------------------|
| #1                                                                | MeSH DESCRIPTOR Diabetes Mellitus EXPLODE ALL TREES |
| #2                                                                | MeSH DESCRIPTOR Hypoglycaemia EXPLODE ALL TREES     |
| #3                                                                | #1 and #2                                           |

### 1.3 Systematic review of primary studies for pre-mixed insulins in type 1 DM

| <b>Medline (PubMed) search strategy</b> |                           |
|-----------------------------------------|---------------------------|
| #1                                      | biphasic                  |
| #2                                      | pre-mix                   |
| #3                                      | #1 OR #2                  |
| #4                                      | insulin                   |
| #5                                      | #3 AND #4                 |
| #6                                      | "Diabetes Mellitus"[Mesh] |
| #7                                      | diabetes                  |
| #8                                      | #6 OR #7                  |

|     |                            |
|-----|----------------------------|
| #9  | type 1                     |
| #10 | #8 AND #9                  |
| #11 | insulin dependent diabetes |
| #12 | #10 OR #11                 |
| #13 | #5 AND #12                 |
