# Supplementary material for: Drug-related risk of severe hypoglycaemia in observational studies: a systematic review and meta-analysis
Source: Springer Nature journal article supplement (doi:10.1186/s12902-015-0052-z), 2015-10-12

## The study selection process.

*Figure 1. Systematic review of observational studies (basic search) – the study selection process.*

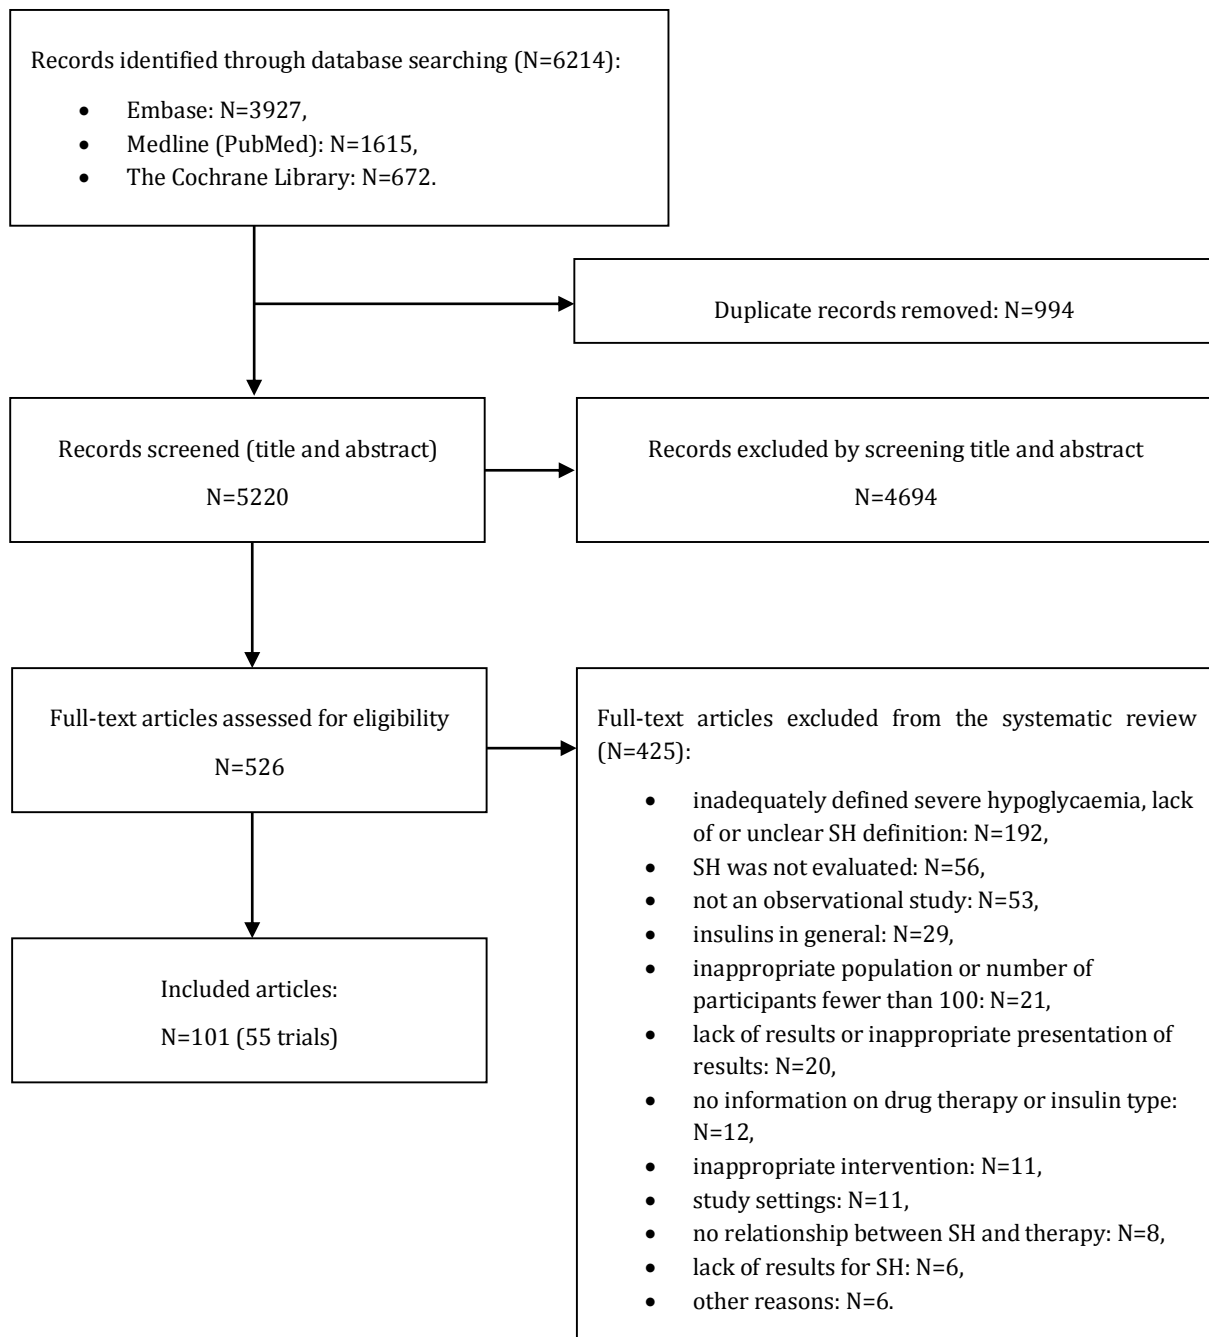

*Figure 2. Systematic review of observational studies (1<sup>st</sup> update) – the study selection process.*

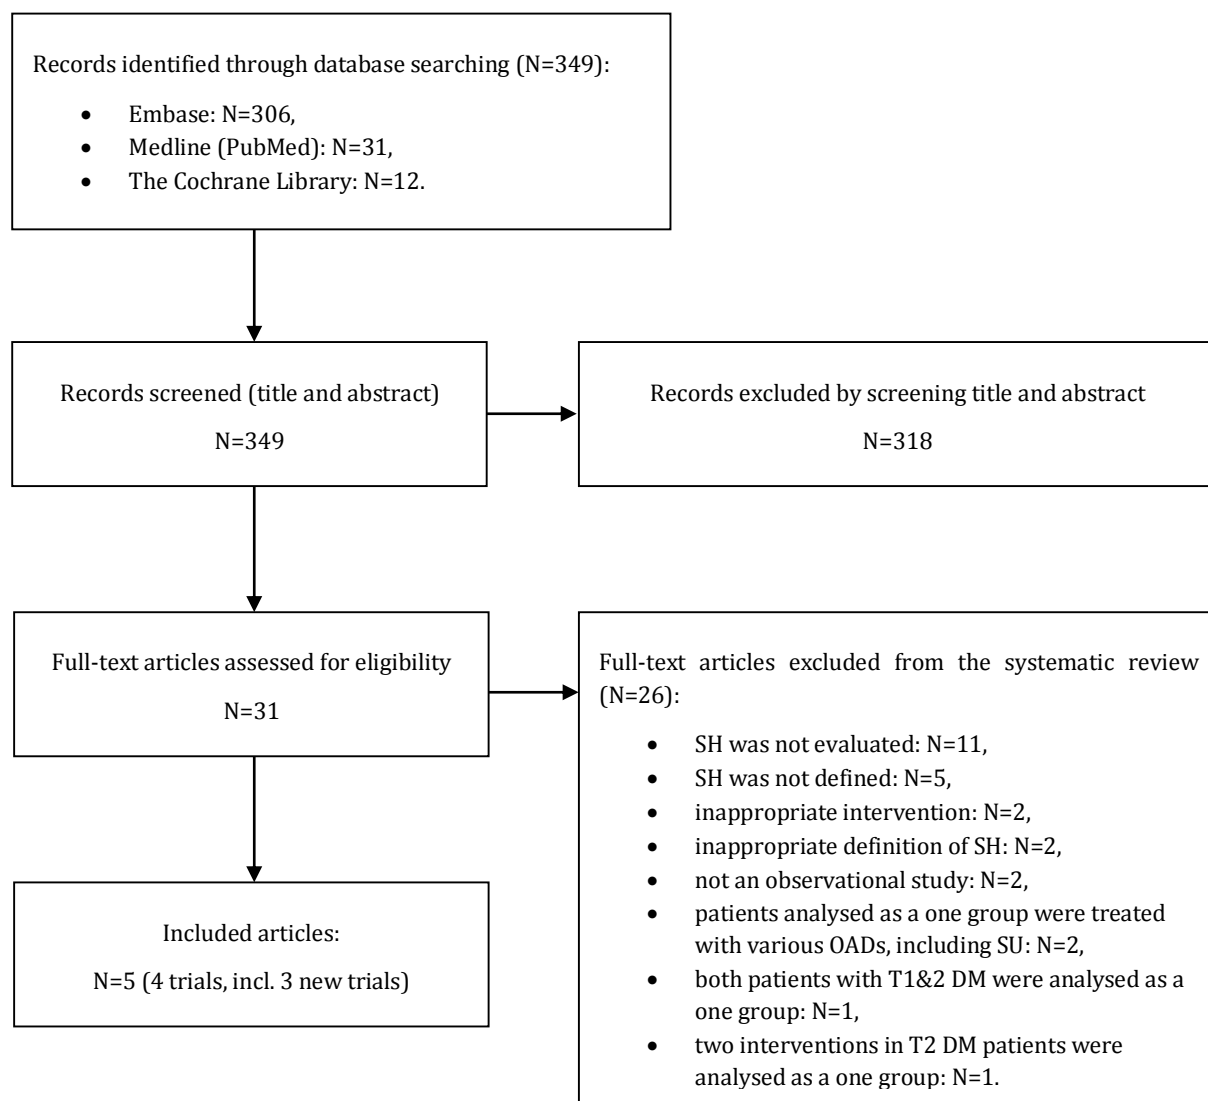

*Figure 3. Systematic review of observational studies (2<sup>nd</sup> update) – the study selection process.*

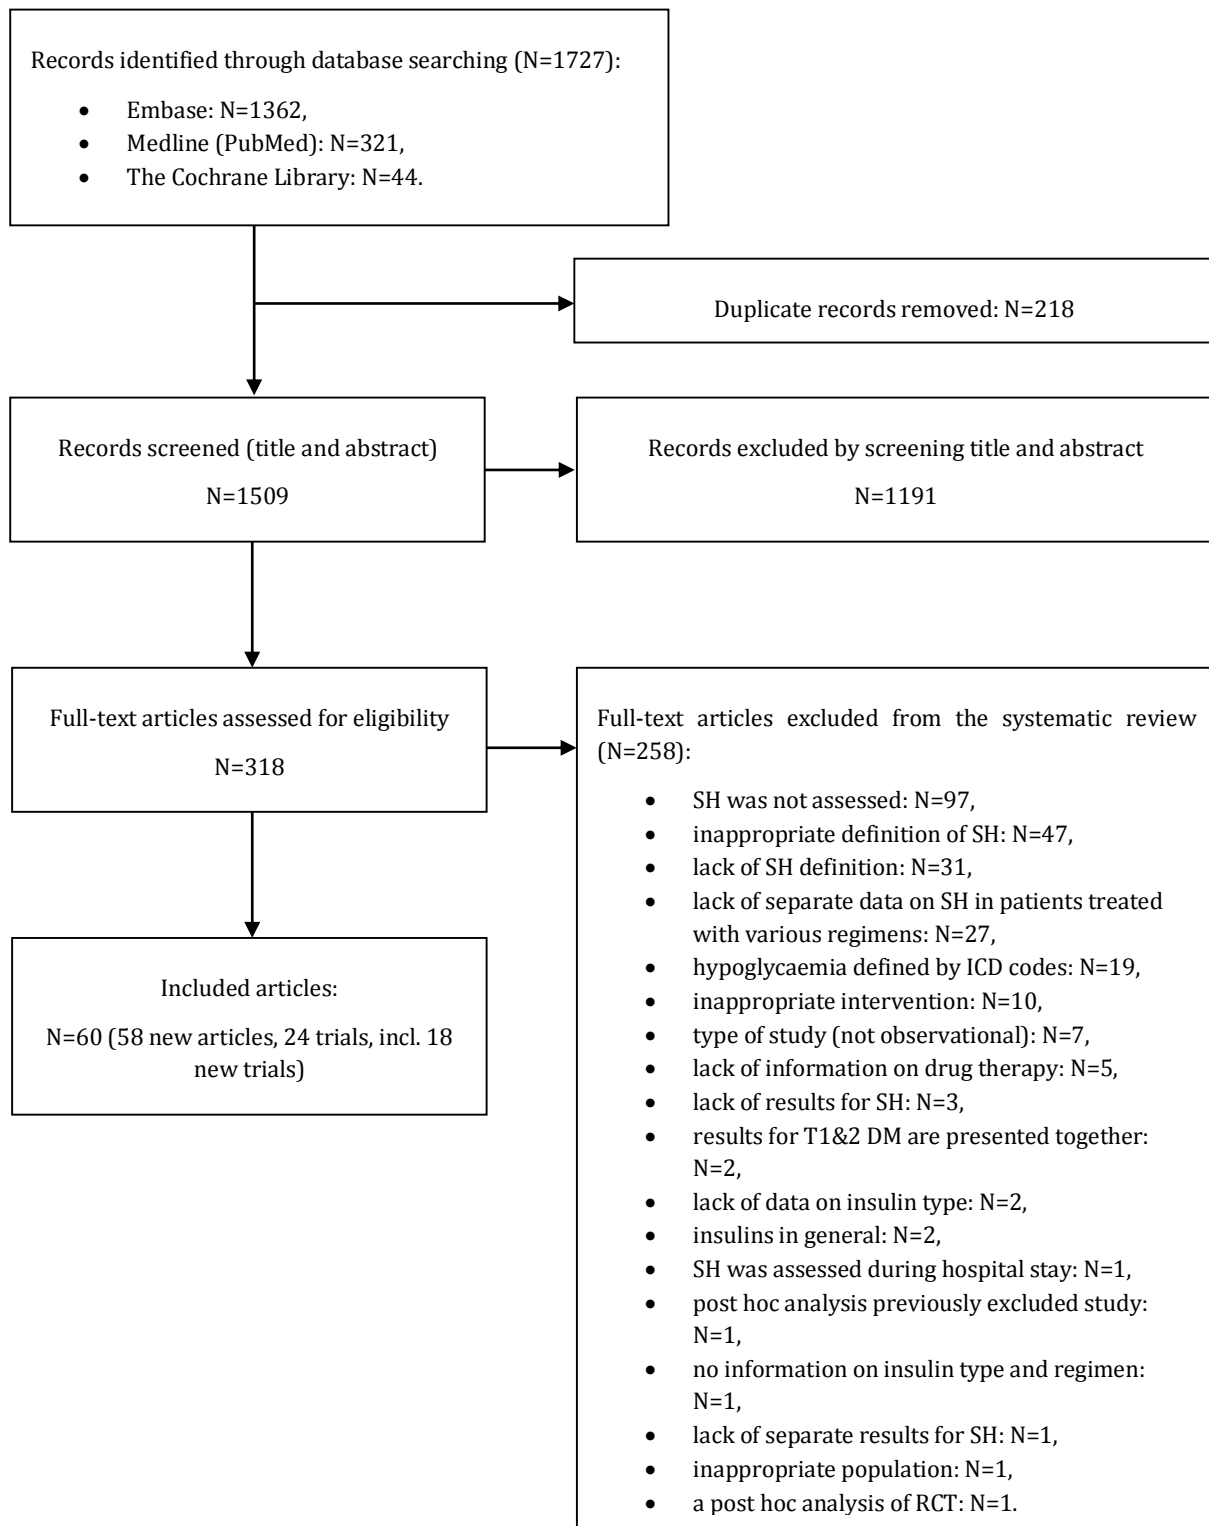

*Figure 4. Supplementary systematic review of secondary studies (risk related to OADs in T2)  
– the study selection process.*

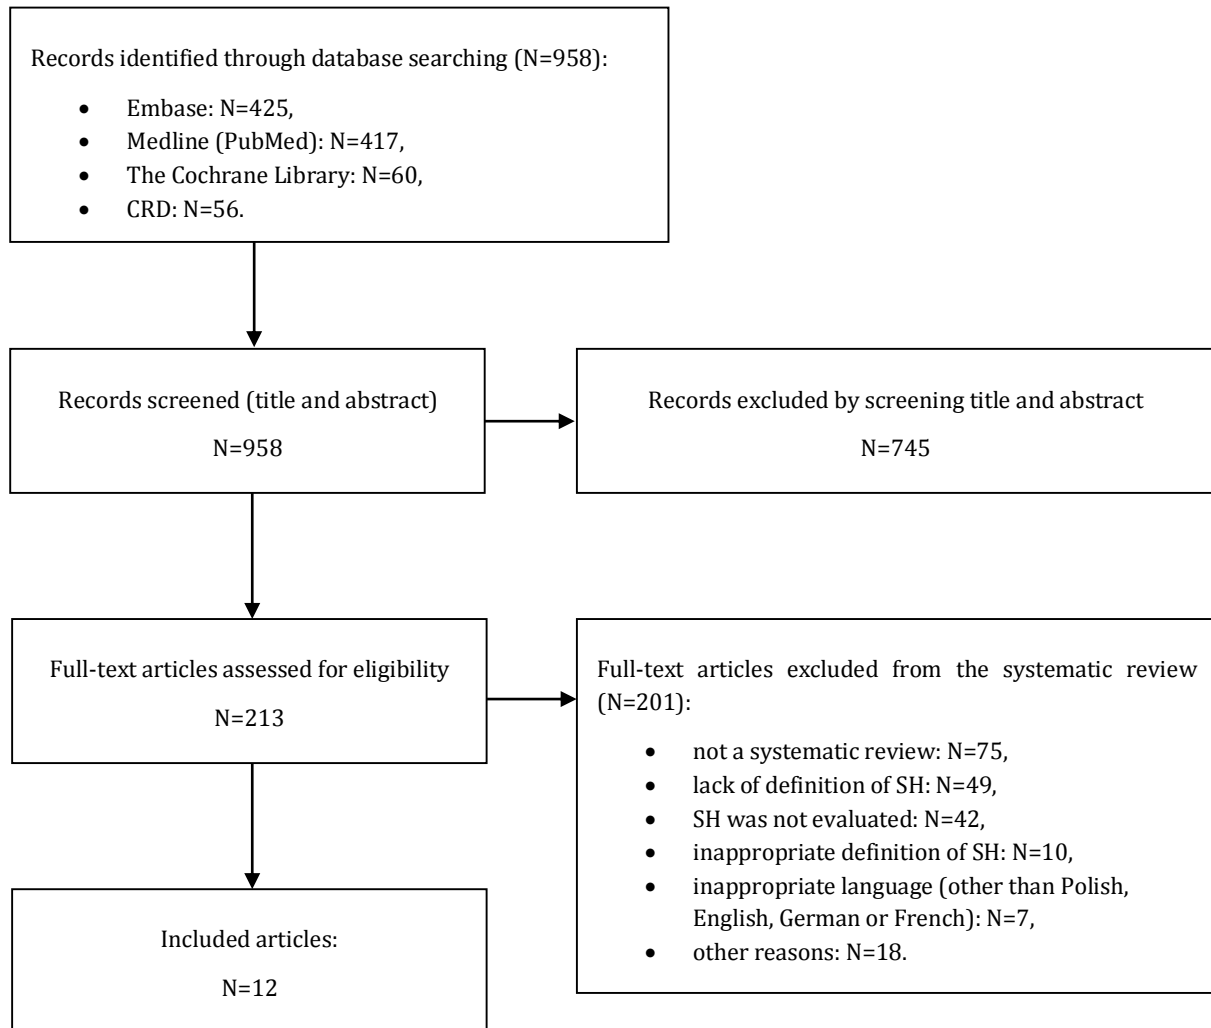

Figure 5. Supplementary systematic review of secondary studies (biphasic therapies in T1) – the study selection process.

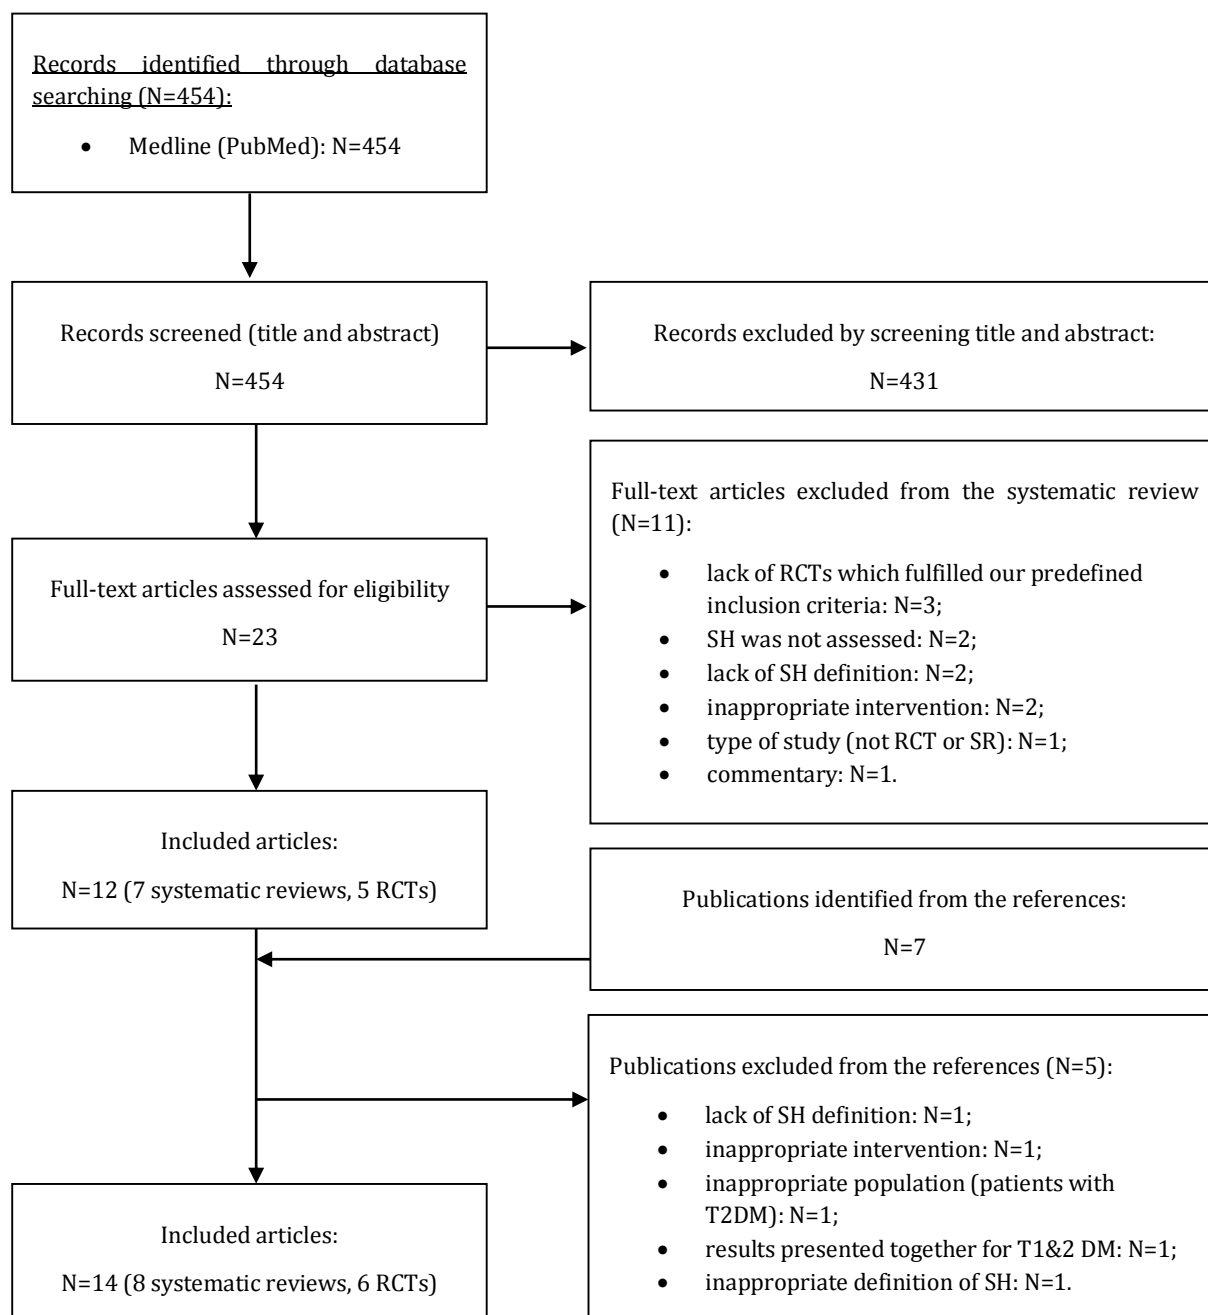

Supplement: MOESM3 [file 9753954]
