# Supplementary material for: Drug-related risk of severe hypoglycaemia in observational studies: a systematic review and meta-analysis
Source: Springer Nature journal article supplement (doi:10.1186/s12902-015-0052-z), 2015-10-12
Supplement: MOESM4 [file 9753954]

## Characteristics of included studies for type 1 DM.

| Study and country                 | Observation time, number of participants and design                                                                                                                   | Treatment of type I DM <sup>a</sup>                                                           | Patients characteristics <sup>a</sup>                                                                                                                                                                                                                                                                                               |
|-----------------------------------|-----------------------------------------------------------------------------------------------------------------------------------------------------------------------|-----------------------------------------------------------------------------------------------|-------------------------------------------------------------------------------------------------------------------------------------------------------------------------------------------------------------------------------------------------------------------------------------------------------------------------------------|
| Bruttomesso 2002<br><i>Italy</i>  | Mean 7.4 years<br>N= 138<br>Retrospective                                                                                                                             | Insulin pump                                                                                  | Adults, age at CSII start, (mean): 33.1 (11.74) years<br>Duration of diabetes, (mean): 13.1 (8.22) years<br>Patients treated with continuous subcutaneous insulin infusion for (mean):: 7.4 (4.70) years                                                                                                                            |
| DAFNE, Keen 2012<br><i>UK</i>     | 1 year<br>N=124<br>Prospective                                                                                                                                        | Basal long-acting insulin analogue + bolus insulin                                            | Adults, mean age: 42.5 (11.1) years<br>Diabetes mean duration: 17.8 (11.0) years                                                                                                                                                                                                                                                    |
| de Bock 2012<br><i>New Zeland</i> | 3 years<br>N=621 (N=75 on CSII)<br>Retrospective                                                                                                                      | Insulin pump                                                                                  | Children, mean age at diagnosis: 6.0 (3.6) years<br>Previous treatment: patients had to use CSII for at least 12 months                                                                                                                                                                                                             |
| Garg 2004a<br><i>USA</i>          | Mean 13.1 months<br>N=292<br>Retrospective                                                                                                                            | Basal long-acting insulin analogue + bolus insulin                                            | Adult, mean age: 32 (10.0) years<br>Diabetes mean duration: 15.9 (10.3)<br>Previous treatment: at least 1 year of insulin therapy prior to beginning insulin glargine therapy and receiving intensive insulin therapy including at least four insulin injections per day with premeal short-acting insulin lispro or insulin aspart |
| Garg 2004b<br><i>USA</i>          | Follow-up period: from April 2001 to March 2003<br>13.1 months (basal bolus analogue group), N=98<br>12.7 months (basal bolus human group), N=98<br><br>Retrospective | Basal long-acting insulin analogue + bolus insulin<br><br>Human basal insulin + bolus insulin | Adults, mean age of patients in basal bolus analogue and human group, respectively: 33.4 (10.1) and 31.1 (8.7) years<br>Diabetes duration, mean: 16.0 (10.4) and 16.8 (9.2) years<br>Previous treatment with NPH in basal-bolus regimen                                                                                             |

| Study and country                                                                                                                                    | Observation time, number of participants and design                                                 | Treatment of type I DM <sup>a</sup>                                                           | Patients characteristics <sup>a</sup>                                                                                                                                                                                                                                                  |
|------------------------------------------------------------------------------------------------------------------------------------------------------|-----------------------------------------------------------------------------------------------------|-----------------------------------------------------------------------------------------------|----------------------------------------------------------------------------------------------------------------------------------------------------------------------------------------------------------------------------------------------------------------------------------------|
| Garg 2004c<br>USA                                                                                                                                    | 13.1 months, insulin glargine, N=299<br>11.6 months insulin pump, N=216<br><br>Retrospective        | Basal long-acting insulin analogue + bolus insulin<br><br>Insulin pump                        | Adults, mean age: 32.0 (10.2) years<br>Diabetes duration, mean: 16.3 (9.9) years<br><br>Previous therapy: at least 1-year of insulin therapy followed by using of insulin pumps or insulin glargine; treatment with insulin glargine as their only basal insulin for at least 6 months |
| Hartemann-Heurtier 2003<br>France                                                                                                                    | 1 year<br>N=110<br>Prospective                                                                      | Human basal insulin + bolus insulin                                                           | Adults, mean age 45 (13) years<br>Diabetes duration, mean 17 (11) years<br>Previous therapy: regular human insulin before each meal (multiple injection/intensive therapy)                                                                                                             |
| Hendrieckx 2014<br>Australia                                                                                                                         | 6 months<br>N=422 (N=109 on insulin pump)<br>Retrospective                                          | Insulin pump                                                                                  | Adults, mean age in total sample: 37.5 (SD=15.0)<br>Diabetes mean duration in total sample: 18.4 (SD=11.9)                                                                                                                                                                             |
| Herwig 2007<br>Germany                                                                                                                               | 1.68 years (mean)<br>N=142<br>Prospective                                                           | Basal long-acting insulin analogue + bolus insulin<br><br>Human basal insulin + bolus insulin | Children, age (range): 5-18 years<br>Duration of diabetes: >1 year                                                                                                                                                                                                                     |
| INTERPRET<br>Austria, Belgium, Czech Republic, Denmark, France, Hungary, Israel, Italy, Lithuania, Poland, Serbia, Slovakia, Slovenia, Spain, Sweden | 12 months<br>N=274<br>Prospective                                                                   | Insulin pump                                                                                  | Children and adults, mean age: 28.04 (SD=15.55) years<br>Diabetes mean duration: 13.87 (SD=10.67) years<br>Previous treatment: patients had to use CSII for at least 6 months                                                                                                          |
| Jakisch 2008<br>Germany, Austria                                                                                                                     | 3 years<br>N=828 (N=412 on insulin pumps)<br>Prospective, multicentre, matched pair cohort analysis | Insulin pump                                                                                  | Children, mean age: 10.9 years (median 11.4; iqr: 8.7-13.7)<br>Mean duration of diabetes: 3.5 years (median 2.7; iqr 1.3–5.2)<br>Previous treatment: conventional or multiple daily injections                                                                                         |

| Study and country                        | Observation time, number of participants and design                                                                                                                            | Treatment of type I DM <sup>a</sup>                                                           | Patients characteristics <sup>a</sup>                                                                                                                                                                                                         |
|------------------------------------------|--------------------------------------------------------------------------------------------------------------------------------------------------------------------------------|-----------------------------------------------------------------------------------------------|-----------------------------------------------------------------------------------------------------------------------------------------------------------------------------------------------------------------------------------------------|
| Kapellen 2007<br><i>Germany, Austria</i> | 33 months<br>N=1567<br>Retrospective                                                                                                                                           | Insulin pump                                                                                  | Children and adolescents, mean age: 12.2 (4.2) years<br>Mean duration of diabetes: 5.2 (3.5) years                                                                                                                                            |
| Kapellen 2009<br><i>Germany, Austria</i> | 12 years – 1-year assessment of SHEs after switching to insulin analogue (short- or long-acting)<br>N=37 206 (N=6558 on BB with long-acting insulin analogue)<br>Retrospective | Basal long-acting insulin analogue + bolus insulin                                            | Children, mean age: 13.3 (4.4, all participants, not only from these 2 groups considered in the SR) years<br>Diabetes duration, mean: 5.2 (4.1, all participants) years<br>Patients had to be on insulin therapy for at least 2 years         |
| Katz 2012<br><i>USA</i>                  | 0.9 year (basal-bolus group), N=50<br>1.57 year (CSII group), N=93<br>Prospective                                                                                              | Insulin pump<br><br>Basal long-acting insulin analogue + bolus insulin                        | Children: median 12.2 (range 9.0–15.0) years<br>Diabetes duration median 4.4 (range 1.0–13.0) years<br>To be included in the study patients had to be treated with: CSII; pump therapy, a basal insulin analogue (detemir or glargine) or NPH |
| Kristensen 2012<br><i>Denmark</i>        | 1 year<br>N=3137 (N=1052 on basal insulin analogue and N=2085 on human insulin)<br>Retrospective                                                                               | Basal long-acting insulin analogue + bolus insulin<br><br>Human basal insulin + bolus insulin | Adults, mean age: 48.0 (14.8) years<br>Diabetes duration, median 22 (range 0-73) years                                                                                                                                                        |
| Laubner 2014<br><i>Austria, Germany</i>  | Follow-up period: from January 2000 to September 2011<br>N=14 681<br>Retrospective                                                                                             | Basal long-acting insulin analogue + bolus insulin<br><br>Human basal insulin + bolus insulin | Adults, mean age: 37.7 (SD=19.8) years<br>Diabetes mean duration: 14.9 (SD=12.8) years<br>Previous treatment: insulin therapy                                                                                                                 |
| Leckie 2005<br><i>Scotland</i>           | 1 year<br>N=243<br>Prospective                                                                                                                                                 | Human basal insulin + bolus insulin                                                           | Adults, range: from 20 to 69 years<br>Diabetes duration: n.a.<br>Previous therapy: n.a.                                                                                                                                                       |

| Study and country                       | Observation time, number of participants and design                                                                                                                     | Treatment of type I DM <sup>a</sup>                | Patients characteristics <sup>a</sup>                                                                                                                                                                                                                                         |
|-----------------------------------------|-------------------------------------------------------------------------------------------------------------------------------------------------------------------------|----------------------------------------------------|-------------------------------------------------------------------------------------------------------------------------------------------------------------------------------------------------------------------------------------------------------------------------------|
| Levy-Shraga 2013<br><i>Israel</i>       | Mean 9.6 (SD=7.0) years<br>N=113 (26 patients in considered group)<br>Retrospective                                                                                     | Insulin pump                                       | Children, (Group 1 with CSII initiation before age 6 years) mean age at diagnosis: 2.4 (SD=1.3); mean age at CSII initiation: 3.4 (SD=1.4) years<br>Diabetes mean duration: 4.7 (SD=2.5) years                                                                                |
| Leinung 2010<br><i>USA</i>              | 1 year<br>N=117<br>Retrospective                                                                                                                                        | Insulin pump                                       | Adults, mean age 44.5 (12.8, range: 14.3-71.7, median: 46) years<br>Diabetes duration, mean 23.9 years<br>Patients were using insulin pumps before index date (i.e. initiation of CGM)                                                                                        |
| Maiorino 2014<br><i>Italy</i>           | 12 weeks<br>N=125 (N=38 on insulin pump)<br>Prospective                                                                                                                 | Insulin pump                                       | Young adults, mean age in CSII group: 21.7 (SD=2.3) years<br>Diabetes mean duration: 9.1 SD=4.0) years<br>Previous treatment: multiple daily injections                                                                                                                       |
| Maltoni 2013<br><i>Italy</i>            | Follow-up period: from January 1990 to December 2010 – 2212.9 patient-years (49.5 patient-years in insulin pump group) (N=36 on insulin pump)<br>N=269<br>Retrospective | Insulin pump                                       | Children and young adults, mean age at T1DM onset: 7.6 (SD=4.1) years                                                                                                                                                                                                         |
| Muller-Godeffroy 2009<br><i>Germany</i> | 0.5 year<br>N=114<br>Prospective                                                                                                                                        | Insulin pump                                       | Children, mean age: 10.5 (3.7) years<br>Diabetes duration, mean: 3.8 (2.9) years<br>Previous treatment: short-acting analogue, NPH, semilente or long-acting analogues                                                                                                        |
| Nimri 2006<br><i>Israel</i>             | 1 year<br>N=279<br>Retrospective                                                                                                                                        | Insulin pump                                       | Children, median age: 5.4 (range 1.6–8.6) years<br>Adolescents, median age: 13.7 (range 9–17) years<br>Adults, median age: 22.8 (range: 17–40) years<br>Previous therapy, multiple daily injections with mean duration: 8.3 (6.9) years<br>Duration of CSII: 2.4 (1.8 ) years |
| PREDICTIVE Marre 2009<br><i>France</i>  | 1 year<br>N=1772 (N=643 with type 1 diabetes)<br>Prospective                                                                                                            | Basal long-acting insulin analogue + bolus insulin | PREDICTIVE French cohort<br>Adults, mean age (SD): 47.1 (16.1) years<br>Diabetes mean duration (SD): 17.0 (12.0) years                                                                                                                                                        |

| Study and country                                                                                                                          | Observation time, number of participants and design                                                                      | Treatment of type I DM <sup>a</sup>                                                           | Patients characteristics <sup>a</sup>                                                                                                                                                                                                                                                                   |
|--------------------------------------------------------------------------------------------------------------------------------------------|--------------------------------------------------------------------------------------------------------------------------|-----------------------------------------------------------------------------------------------|---------------------------------------------------------------------------------------------------------------------------------------------------------------------------------------------------------------------------------------------------------------------------------------------------------|
| PREDICTIVE Preumont 2009<br><i>Belgium</i>                                                                                                 | 0.5 year<br>N=232<br>Prospective                                                                                         | Basal long-acting insulin analogue + bolus insulin                                            | PREDICTIVE Belgian cohort - only patients who were previously treated with NPH or glargine as basal insulin<br>Adults, mean age (SD): 45 (15) years<br>Diabetes mean duration (SD): 18 (13) years                                                                                                       |
| PREDICTIVE Sreenan 2008<br><i>Austria, Czech Republic, Denmark, Finland, Germany, Ireland, Israel, the Netherlands, Sweden, Turkey, UK</i> | 12 weeks prospectively and 4 retrospectively<br>N=3637 (N=1500 with type 1)<br>Prospective with retrospective assessment | Basal long-acting insulin analogue + bolus insulin<br><br>Human basal insulin + bolus insulin | PREDICTIVE – only patients who were previously treated with NPH as basal insulin<br><sup>b</sup> Adults, mean age (SD): 40.9 (17.2)<br><sup>b</sup> Diabetes mean duration (SD): 14.1 (11.5)                                                                                                            |
| PREDICTIVE Yenigun 2008<br><i>Austria, Czech Republic, Denmark, Finland, Germany, Ireland, Israel, the Netherlands, Sweden, Turkey, UK</i> | 12 weeks prospectively and 4 retrospectively<br>N=1285 (N=508 with type 1)<br>Prospective with retrospective assessment  | Basal long-acting insulin analogue + bolus insulin                                            | PREDICTIVE – only patients who were previously treated with glargine as basal insulin<br>Adults, mean age: 44.45 years<br>Diabetes mean duration: 18.85 years                                                                                                                                           |
| Reda 2007<br><i>New Zealand</i>                                                                                                            | 315 patient-years; mean 3 years<br><br>N=105<br>Retrospective                                                            | Insulin pump                                                                                  | Adults and children, mean age at CSII start: 33.1 (15.9; range 6.5-66.2) years<br>Diabetes duration, mean at CSII start: 18.2 (10.9; range 2-47) years<br>Previous therapy: patients had to be on CSII from at least 1 year, mean CSII duration: 3.0 (2.6); switched from MDI, mean duration: 7.2 (4.6) |
| Rudolph 2002<br><i>USA</i>                                                                                                                 | 36.1 months<br>N=107<br>Retrospective review of medical records                                                          | Insulin pump                                                                                  | Adults, mean age 36.0 (10.4) years<br>Diabetes duration at the CSII initiation 17.0 (9.1) years<br>Patients had to receive CSII therapy with more than 2 visits for clinical data collection                                                                                                            |

| Study and country                                                                                                                                                                                                                                                                       | Observation time, number of participants and design                                                                                     | Treatment of type I DM <sup>a</sup> | Patients characteristics <sup>a</sup>                                                                                                                                                                                                |
|-----------------------------------------------------------------------------------------------------------------------------------------------------------------------------------------------------------------------------------------------------------------------------------------|-----------------------------------------------------------------------------------------------------------------------------------------|-------------------------------------|--------------------------------------------------------------------------------------------------------------------------------------------------------------------------------------------------------------------------------------|
| Scaramuzza 2011<br><i>Italy</i>                                                                                                                                                                                                                                                         | 1.7 years, retrospective<br>1.4 years, prospective<br>N=622 (N=493 on insulin pump)<br>Multicenter, observational<br>before-after study | Insulin pump                        | Children, mean age: 12.9 (3.4) years<br>Diabetes duration, mean: 6.2 (3.3) years<br>Children on pump therapy for mean 1.7 (0.5) years                                                                                                |
| Scheidegger 2007<br><i>Switzerland</i>                                                                                                                                                                                                                                                  | 104 patient-months<br>N=159<br>Prospectively                                                                                            | Insulin pump                        | Adults, mean age: 42.8 (11.2) years<br>Diabetes duration, mean: 18.2 (11.0) years<br>Patients previously treated with MDI                                                                                                            |
| Wood 2006<br><i>USA</i>                                                                                                                                                                                                                                                                 | 3.8 years of follow-up<br>N=161<br>Prospective                                                                                          | Insulin pump                        | Children and young adults, mean age: 14.1 (3.7; range 3.7-21.7), years<br>Diabetes duration, mean: 7.1 (4.0; range 0.7-16.7), years<br>Previous therapy: n.a.; patients had to start CSII therapy between 1 Jan 1998 and 31 Dec 2001 |
| Ziegler 2013<br><i>France, Germany, Italy, Spain, Sweden</i>                                                                                                                                                                                                                            | 6 months<br>N=299<br>Prospective                                                                                                        | Insulin pump                        | Adults, mean age: 39.4 (SD=15.2) years<br>CSII mean duration: 7.0 (SD=5.2) years<br>Previous treatment: patients had to use CSII for at least 6 months                                                                               |
| <sup>a</sup> Data are presented only for patients groups treated according with scheme assumed in the SR and with type 1 DM unless no separate data on a group of interest was available (then characteristics of a whole study are shown). Means are presented with SD (if available). |                                                                                                                                         |                                     |                                                                                                                                                                                                                                      |

## Characteristics of included studies for type 2 DM.

| Study and country                                                                                                                                                                                                                                                                                                                                                      | Observation time, number of participants and design                                                                                                                                                                                                 | Treatment of type II DM <sup>a</sup>                                                                                                       | Patients characteristics <sup>a</sup>                                                                                                                                                                                                                                                          |
|------------------------------------------------------------------------------------------------------------------------------------------------------------------------------------------------------------------------------------------------------------------------------------------------------------------------------------------------------------------------|-----------------------------------------------------------------------------------------------------------------------------------------------------------------------------------------------------------------------------------------------------|--------------------------------------------------------------------------------------------------------------------------------------------|------------------------------------------------------------------------------------------------------------------------------------------------------------------------------------------------------------------------------------------------------------------------------------------------|
| A <sub>1</sub> chieve, Home 2011<br><i>China; South Asia (Bangladesh, India, Pakistan); East Asia (Indonesia, Korea, Malaysia, Philippines, Singapore, Taiwan); north Africa (Algeria, Morocco, Tunisia, Libya); Middle East/Gulf (Egypt, Iran, Jordan, Turkey, Bahrain, Kuwait, Oman, Qatar, Saudi Arabia, UAE, Yemen); Latin America (Argentina, Mexico), Russia</i> | 24 weeks<br>N=66 726 (N=40 909 on biphasic insulin analogue, N=15 545 on BOT with long-acting insulin analogue, N=4105 on BB with long-acting insulin analogue)<br>International, prospective, multicentre, non-interventional, observational study | Pre-mix insulin analogue ± OADs<br>Basal long-acting insulin analogue ± OADs<br>Basal bolus with basal long-acting insulin analogue ± OADs | Adult, mean age: 54.0 (12.0) years<br>Diabetes mean duration: 8.0 (6.2) years<br>Previous treatment: prior to enrolment in the study, 58.2% of patients were being treated with OADs alone, 23.8% were receiving OADs + insulin therapy, 8.1% insulin only and 9.0% no medication for diabetes |
| A <sub>1</sub> chieve, El-Naggar 2012<br><i>China, South Asia, East Asia, North Africa, Middle East/Gulf</i>                                                                                                                                                                                                                                                           | 24 weeks<br>N=6323<br>Prospective                                                                                                                                                                                                                   | Pre-mix insulin human<br>Pre-mix insulin analogue                                                                                          | Adults, mean age: 55.4 (12.5) years<br>Diabetes mean duration: 11.1 (6.6) years                                                                                                                                                                                                                |
| A <sub>1</sub> chieve, El-Naggar 2013<br><i>Gulf</i>                                                                                                                                                                                                                                                                                                                   | 24 weeks<br>N=10 704 (N=6153 in insulin-naïve group and N=4551 in prior insulin users group)<br>Prospective                                                                                                                                         | Pre-mix analogue                                                                                                                           | Adults, mean age of insulin-naïve and prior insulin users group, respectively: 50.4 (9.7) and 51.5 (12.6) years<br>Diabetes mean duration of insulin-naïve and prior insulin users group, respectively: 8.5 (5.1) and 11.7 (6.5) years                                                         |
| Andayani 2010<br><i>Indonesia</i>                                                                                                                                                                                                                                                                                                                                      | 6 month<br>N=115 (N=49 received SU)<br>Prospective                                                                                                                                                                                                  | Sulfonylurea                                                                                                                               | Adult, mean age: 62.84 (7.85) years<br>Diabetes duration, mean 11.92 (6.09) years<br>Patients failing with oral antidiabetic medication                                                                                                                                                        |
| Aung 2012<br><i>Scotland</i>                                                                                                                                                                                                                                                                                                                                           | 1 year<br>N=1066<br>Cross-sectional, population-based study                                                                                                                                                                                         | Sulfonylurea                                                                                                                               | Adult, mean age: 67.9 (4.2) years<br>Diabetes mean duration: 8.1 (6.5) years                                                                                                                                                                                                                   |

|                                                                 |                                                                                                      |                                                                    |                                                                                                                                                                                                                                                                                                    |
|-----------------------------------------------------------------|------------------------------------------------------------------------------------------------------|--------------------------------------------------------------------|----------------------------------------------------------------------------------------------------------------------------------------------------------------------------------------------------------------------------------------------------------------------------------------------------|
| <p>BIAsp Start, Berntrop 2011<br/><i>Sweden</i></p>             | <p>27 weeks<br/>N=1154<br/>Prospective,<br/>observational,<br/>multicentre study</p>                 | <p>Pre-mix insulin<br/>analogue ±OADs</p>                          | <p>Adult, mean age: 65 (11.5) years<br/>Diabetes mean duration: 8.1 (6.2) years<br/>Previous treatment: patients with or without<br/>previous OAD treatment</p>                                                                                                                                    |
| <p>Biesenbach 2006<br/><i>Austria</i></p>                       | <p>1 year<br/>N=154 (N=34 on BB with<br/>NPH)<br/>Retrospective</p>                                  | <p>Basal bolus with<br/>NPH ±OADs</p>                              | <p>Adult, mean age: insulin only: 67.7 (11.9)<br/>and 68.5 (9.2); SU + insulin 73.7 (8.9) years<br/>Diabetes duration, mean: insulin only 9<br/>(range 3-12) and 8 (2-9); SU + insulin 7 (2-<br/>8) years<br/>Patients newly treated with insulin due to<br/>failure of secondary SU treatment</p> |
| <p>Buturovic 2013<br/><i>Bosnia and Herzegovina</i></p>         | <p>9 months<br/>N=278<br/>Prospective</p>                                                            | <p>Basal bolus with<br/>basal long-acting<br/>insulin analogue</p> | <p>Adults, mean age: 60.2 (SD=8.8) years<br/>Diabetes mean duration: 10.1 (SD=6.4)<br/>years<br/>Previous treatment: at least 2 daily injections<br/>of pre-mixed insulin for at least 6 months</p>                                                                                                |
| <p>Danish BIAsp Study Group, Breum 2008<br/><i>Denmark</i></p>  | <p>26 weeks<br/>N=421<br/>Prospective</p>                                                            | <p>Pre-mix insulin<br/>analogue ± OADs</p>                         | <p>Adult, mean age: 62.0 (11.4) years<br/>Diabetes mean duration: 9.1 (8.1) years<br/>Previous treatment: 199 subjects were prior<br/>insulin users and 193 were insulin naïve<br/>patients</p>                                                                                                    |
| <p>EARLY, Hanefeld 2012<br/><i>Germany</i></p>                  | <p>24 weeks<br/>N=1438 (N=1389 on<br/>BOT with long-acting<br/>insulin analogue)<br/>Prospective</p> | <p>BOT with long-<br/>acting insulin<br/>analogue</p>              | <p>Adult, mean age: 65.56 (10.68) years<br/>Diabetes duration, mean: 7.06 (5.45) years<br/>Patients treated with maximally tolerated<br/>metformin doses for at least three months</p>                                                                                                             |
| <p>Echtay 2013<br/><i>Israel, Jordan, Pakistan, Lebanon</i></p> | <p>24 weeks<br/>N=2155<br/>Prospective</p>                                                           | <p>BOT with long-<br/>acting insulin<br/>analogue</p>              | <p>Adults, mean age: 57.2 (SD=11.0) years<br/>Diabetes mean duration: 9.2 (SD=5.4) years<br/>Previous treatment: at least one oral anti-<br/>diabetic drugs (metformin, sulfonyleureas,<br/>repaglinide, thiazolidinediones)</p>                                                                   |



|                                                                                                                                 |                                                                                                                                                   |                                                             |                                                                                                                                                                                     |
|---------------------------------------------------------------------------------------------------------------------------------|---------------------------------------------------------------------------------------------------------------------------------------------------|-------------------------------------------------------------|-------------------------------------------------------------------------------------------------------------------------------------------------------------------------------------|
| Exhype, Pettersson 2011<br><i>Sweden</i>                                                                                        | 6 months<br>N=430<br>Retrospective                                                                                                                | Sulfonylurea                                                | Adult, mean age: 69.0 (9.5) years<br>Diabetes duration >7 years: 71% of patients<br>Participants had to be treated with metformin and SU for at least 6 months (insulin naive)      |
| FINE, Tsai 2011<br><i>Bangladesh, China, Hong Kong, India, Indonesia, Korea, Pakistan, Singapore, Taiwan, Thailand, Vietnam</i> | 6 months<br>N=2679 (N=2077 on BOT with long acting-insulin analogue and N=589 on BOT with NPH)<br>Multinational, prospective, observational study | Basal long-acting insulin analogue ±OADs<br>Basal NPH ±OADs | Adult, mean age: 56.4 (11.2) years<br>Diabetes mean duration: 9.3 (6.5) years                                                                                                       |
| Furlong 2002<br><i>UK</i>                                                                                                       | 29 months (median)<br>N=208<br>Retrospective                                                                                                      | BOT with NPH                                                | Adult, mean age: metformin 58.6 (9.0), SU 64.3 (9.6) years<br>Diabetes duration: metformin 7 (1-25), SU 9 (1-29) years<br>Patients inadequately controlled with OADs                |
| Gomez-Peralta 2012<br><i>Spain</i>                                                                                              | 6 months<br>N=131<br>Retrospective                                                                                                                | BOT long-acting analogue                                    | Adults, mean age: 68.2 (9.4) years<br>Diabetes mean duration: 12.7 (6.9) years                                                                                                      |
| Gu 2012<br><i>China</i>                                                                                                         | 16 weeks<br>N=660<br>Prospective, open-label, multicentre, observational                                                                          | Pre-mix human insulin ± OADs                                | Adult, median age: 61.9 (iq: 52.7, 71.4) years<br>Diabetes duration, median: 6.7 (ig: 3.7, 10.2) years<br>Patients treated with ≥2 OADs (≥1 insulin secretagogue) and insulin-naive |
| Guo 2013<br><i>China</i>                                                                                                        | 16 weeks<br>N=391<br>Prospective                                                                                                                  | Sulfonylurea                                                | Adults, mean age: 53.1 (SD=10.3) years<br>Diabetes mean duration: 22.5 (SD=38.8) months<br>Previous treatment: none                                                                 |

|                                                                                                                              |                                                                                                                                                                                   |                                                                                    |                                                                                                                                                                               |
|------------------------------------------------------------------------------------------------------------------------------|-----------------------------------------------------------------------------------------------------------------------------------------------------------------------------------|------------------------------------------------------------------------------------|-------------------------------------------------------------------------------------------------------------------------------------------------------------------------------|
| Honkasalo 2010, Honkasalo 2011<br><i>Finland</i>                                                                             | 1 year<br>N=680 (N=431 with type 2 diabetes)<br>Retrospective                                                                                                                     | Basal NPH ± OADs                                                                   | Adult, median age: 53.1 (8.6) years<br>Diabetes duration: n.a.                                                                                                                |
| IMPROVE, Gumprecht 2009<br><i>Canada, China, Greece, Gulf region, India, Iran, Italy, Japan, Poland, Russia, South Korea</i> | 13 weeks<br>N=748 (N=497 on prestudy BOT with NPH and N=245 on prestudy BOT with long acting-insulin analogue)<br>Only results of retrospective assessment are included in the SR | Basal long-acting insulin analogue ±OADs (prestudy)<br>Basal NPH ± OADs (prestudy) | IMPROVE – only patients who were previously treated with basal insulin<br>Mean age (SD): 59.7 (11.8) years<br>Mean diabetes duration (SD): 11.4 (7.3) years                   |
| IMPROVE, Khader 2010<br><i>Saudi Arabia, United Arab Emirates, Kuwait, Qatar and Oman</i>                                    | 6 months<br>N=1613<br>Prospective                                                                                                                                                 | Pre-mix insulin analogue ±OADs                                                     | IMPROVE - Gulf region, all patients<br>Mean age (SD): 50.5 (10.4) years<br>Mean diabetes duration (SD): 10.1 (5.8) years                                                      |
| IMPROVE, Shah 2009 a<br><i>Canada, China, Greece, Gulf region, India, Iran, Italy, Japan, Poland, Russia, South Korea</i>    | 13 weeks<br>N=3856<br>Only results of retrospective assessment are included in the SR                                                                                             | Pre-mix human insulin ±OADs                                                        | IMPROVE – only patients who were previously treated with biphasic human insulin 30 ±OADs<br>Mean age (SD): 57.0 (11.5) years<br>Mean diabetes duration (SD): 10.7 (6.9) years |
| IMPROVE, Valensi 2009<br><i>Canada, China, India, Japan, Poland, Russia, Greece, Italy</i>                                   | 6 months<br>N=52 419<br>Prospective                                                                                                                                               | Pre-mix insulin analogue ±OADs                                                     | IMPROVE – 8 countries, all patients<br>Mean age (SD): 55.3 (11.9) years<br>Mean diabetes duration (SD): 7.0 (6.1) years                                                       |
| INITIATEplus, Oyer 2011<br><i>USA</i>                                                                                        | 24 weeks<br>N=4875<br>Multicenter, open-label, prospective study                                                                                                                  | Pre-mix insulin analogue ±OADs                                                     | Adult, mean age: 54.0 (2.01) years<br>Diabetes mean duration: n.a.<br>Previous treatment: n.a.                                                                                |

|                                                    |                                                                                                                                                 |                                                                                           |                                                                                                                                                                                                                |
|----------------------------------------------------|-------------------------------------------------------------------------------------------------------------------------------------------------|-------------------------------------------------------------------------------------------|----------------------------------------------------------------------------------------------------------------------------------------------------------------------------------------------------------------|
| Ivanyi 2012<br><i>Hungary</i>                      | 132 weeks<br>N=155<br>Prospective                                                                                                               | Sulfonylurea                                                                              | Adult, range: 20-75, mean age 58.7 (9.0) years<br>Diabetes duration, mean: 9.1 (5.9) years<br>Patients treated with metformin, SU or both                                                                      |
| JDDM23, Oishi 2012<br><i>Japan</i>                 | 6 months<br>N=153<br>Prospective with 12-week retrospective assessment                                                                          | Basal bolus with NPH ± OADs<br>Basal bolus with long-acting insulin analogue ± OADs       | Adult, mean age: 60.2 (10.8) years<br>Diabetes mean duration: 13.6 (9.2) years<br>Previous treatment: NPH insulin                                                                                              |
| Kawamori 2008<br><i>Brazil (Japanese patients)</i> | 0.46 year<br>N=100<br>Prospective                                                                                                               | BOT with long-acting insulin analogue                                                     | Adult, mean age: 58.4 (7.7; median 59.0) years<br>Diabetes duration, mean: 11.5 (6.6) years<br>Patients inadequately controlled with SU (± other OAD); glimepiride was used for at least 2 months before study |
| Klen 2014<br><i>Slovenia</i>                       | 3 months<br>N=156<br>Prospective                                                                                                                | Sulfonylurea                                                                              | Adults, mean age: 63.6 (SD=7.7) years<br>Diabetes mean duration: 10.6 (SD=7.1) years<br>Previous treatment: sulphonylurea in monotherapy or in combination with metformin for at least six months              |
| Kulzer 2014<br><i>Germany</i>                      | 1771 respondent-weeks<br>N=614 (N=91 with T2DM on long-acting insulin only; N=253 with T2DM on short- and long-acting insulin)<br>Retrospective | Basal long-acting insulin analogue<br>Basal bolus with basal long-acting insulin analogue | Adults, mean age in T2DM group: 53.10 (SD=12.23) years<br>Diabetes average duration in T2DM group: 11.6 (SD=8.6) years<br>Previous treatment: insulin                                                          |
| Laubner 2014<br><i>Austria, Germany</i>            | Follow-up period: from January 2000 to September 2011<br>N=37 283<br>Retrospective                                                              | Basal bolus with basal long-acting insulin analogue<br>Basal bolus with NPH               | Adults, mean age: 71.2 (SD=11.3) years<br>Diabetes mean duration: 14.6 (SD=9.7) years<br>Previous treatment: insulin therapy                                                                                   |

|                                     |                                                                                                            |                                              |                                                                                                                                                                                                                                                                                                                                                                                                                                              |
|-------------------------------------|------------------------------------------------------------------------------------------------------------|----------------------------------------------|----------------------------------------------------------------------------------------------------------------------------------------------------------------------------------------------------------------------------------------------------------------------------------------------------------------------------------------------------------------------------------------------------------------------------------------------|
| Levit 2011<br><i>Israel</i>         | Mean (SD) 2.9 year (0.9)<br>N=115<br>Retrospective                                                         | Pre-mix insulin<br>analogue ± OADs           | Adult, mean age: 62.4 (12.2) years<br>Diabetes duration: 10.1 (8.0) years<br>Prior therapy: one or more OADs or insulin<br>therapy (basal, prandial, basal-bolus)                                                                                                                                                                                                                                                                            |
| LIGHT, Verges 2012<br><i>France</i> | 3 months<br>N=2541<br>Longitudinal,<br>observational study                                                 | BOT with long-<br>acting insulin<br>analogue | Adult, mean age: 63.7 (10.1) years<br>Diabetes mean duration: n.a.                                                                                                                                                                                                                                                                                                                                                                           |
| Ligthelm 2009<br><i>Denmark</i>     | 18 months<br>N=150<br>Prospective                                                                          | Pre-mix insulin<br>analogue ± OADs           | Adult, mean age of insulin naïve group, NPH<br>group, insulin glargine group and BHI 30<br>group, respectively: 56.7 (range 34–79),<br>59.4 (range 41–77), 59.4 (range 41–77) and<br>60.7 (range 51–78) years<br>Diabetes mean duration of insulin naïve<br>group, NPH group, insulin glargine group<br>and BHI 30 group, respectively: 6.7 (range<br>4.2–9.7), 8.3 (range 6.5–14.3), 7.8 (range<br>4.4–9.6) and 10.9 (range 7.1–18.2) years |
| Makela 2012<br><i>Finland</i>       | 26 weeks<br>N=557<br>Observational, non-<br>interventional, non-<br>randomised, open-label,<br>prospective | Pre-mix insulin<br>analogue ± OADs           | Adult, mean age: 65.8 (range 30.0–90.0)<br>years<br>Diabetes mean duration: 11.4 (6.9) years                                                                                                                                                                                                                                                                                                                                                 |
| Nakashima 2013<br><i>Japan</i>      | 48 weeks (3x16 weeks)<br>N=135<br>Prospective                                                              | Pre-mix insulin<br>analogue                  | Adults, mean age: 60.3 (SD=10.2) years<br>Diabetes mean duration: 11.4 (SD=7.1)<br>years<br>Previous treatment: OADs for at least 90<br>days prior to the start of the study and no<br>insulin therapy within 6 months prior to the<br>study                                                                                                                                                                                                 |

|                                                                                                                                                                           |                                                                                                                                                                                                 |                                                                                                        |                                                                                                                                                                                                                                                                               |
|---------------------------------------------------------------------------------------------------------------------------------------------------------------------------|-------------------------------------------------------------------------------------------------------------------------------------------------------------------------------------------------|--------------------------------------------------------------------------------------------------------|-------------------------------------------------------------------------------------------------------------------------------------------------------------------------------------------------------------------------------------------------------------------------------|
| Nobels 2012<br><i>Belgium, Luxembourg</i>                                                                                                                                 | 26 weeks<br>N=592<br>Prospective with 4-week<br>prestudy data                                                                                                                                   | Pre-mix insulin<br>analogue ± OADs<br>Pre-mix human<br>insulin ± OADs                                  | Adult, mean age: 68.0 (10.6) years<br>Diabetes mean duration: 14.6 (8.9) years<br>Previous treatment: BHI therapy                                                                                                                                                             |
| Obstacle Hypoglycaemia Study, Kalra 2013<br><i>India</i>                                                                                                                  | 12 weeks<br>N=1069<br>Prospective                                                                                                                                                               | Sulfonylurea                                                                                           | Adults, mean age: 52.21 (SD=10.70) years<br>Diabetes mean duration: 3.80 (SD=3.82)<br>years<br>Previous treatment: OADs                                                                                                                                                       |
| Ostenson 2014<br><i>Austria, Denmark, Finland, Norway, Sweden, Switzer-land,<br/>the Netherlands</i>                                                                      | 11 440 respondent-<br>weeks<br>N=3827 (N=812 with<br>T2DM on long-acting<br>insulin only; N=942 with<br>T2DM on short- and<br>long-acting insulin)<br>Retrospective                             | Basal long-acting<br>insulin analogue<br><br>Basal bolus with<br>basal long-acting<br>insulin analogue | Adults, mean age in T2DM group: 60.3<br>(SD=10.7) years<br>Diabetes mean duration in T2DM group:<br>N=41 (<2 years); N=317 (2-5 years); N=394<br>(5-9 years); N=546 (10-14 years); N=806<br>(15+ years)<br>Previous treatment: insulin                                        |
| Panelo 2013<br><i>Philippines</i>                                                                                                                                         | 6 months<br>N=2370<br>Prospective                                                                                                                                                               | Sulfonylurea                                                                                           | Adults, mean age: 54.32 (SD=11.56) years<br>Diabetes mean duration: 5.16 (SD=4.72)<br>years<br>Previous treatment: oral drug therapy                                                                                                                                          |
| Pirags 2012<br><i>China, Croatia, Czech Republic, Egypt, Estonia, Latvia,<br/>Poland, Romania, , Slovak Republic, Turkey</i>                                              | 12 months<br>N=1139<br>Prospective                                                                                                                                                              | Pre-mix insulin<br>analogue                                                                            | Adults, mean age: 57.9 (10.1) years<br>Diabetes mean duration: 9.2 (5.9) years                                                                                                                                                                                                |
| PREDICTIVE, Dornhorst 2008 b<br><i>Austria, Czech Republic, Denmark, Finland, Germany,<br/>Ireland, Israel, the Netherlands, Sweden, Turkey, the UK</i>                   | 4-week retrospectively<br>N=293 (N=175 on BOT<br>with NPH and N=118 on<br>BOT with long-acting<br>insulin analogue)<br>Only results of<br>retrospective<br>assessment are included<br>in the SR | BOT with long-<br>acting insulin<br>analogue<br>BOT with NPH                                           | PREDICTIVE – patients who were<br>previously treated with BOT<br>Adult, mean (SD) age: 60.9 (10.9) years and<br>63.5 (11.4), NPH and glargine group<br>respectively<br>Diabetes mean (SD) duration: 11.6 (7.0)<br>years and 9.9 (6.5), NPH and glargine group<br>respectively |
| PREDICTIVE, Meneghini 2009<br><i>Denmark, Finland, Sweden, Austria, Germany, The Czech<br/>Republic, Israel, Turkey, the Netherlands, the United<br/>Kingdom, Ireland</i> | 12 weeks<br>N=1832<br>Prospective                                                                                                                                                               | BOT with long-<br>acting insulin<br>analogue                                                           | PREDICTIVE – sub-analysis of cohort of<br>insulin-naïve patients<br>Mean (SD) age: 60.8 (10.9) years<br>Mean (SD) diabetes duration: 8.0 (5.9) years                                                                                                                          |

|                                                                                                                                                                                         |                                                                                                                                     |                                                                       |                                                                                                                                                                                                                                                                                                                                                                                      |
|-----------------------------------------------------------------------------------------------------------------------------------------------------------------------------------------|-------------------------------------------------------------------------------------------------------------------------------------|-----------------------------------------------------------------------|--------------------------------------------------------------------------------------------------------------------------------------------------------------------------------------------------------------------------------------------------------------------------------------------------------------------------------------------------------------------------------------|
| PREDICTIVE, Sreenan 2008                                                                                                                                                                | 12 weeks<br>N=3637 (N=2137 with type 2 diabetes)<br>Prospective with 4-week retrospective assessment                                | Basal-bolus with long-acting insulin analogue<br>Basal-bolus with NPH | PREDICTIVE – patients who were previously treated with NPH + bolus<br><sup>b</sup> Mean (SD) age: 60.5 (10.2) years<br><sup>b</sup> Mean (SD) diabetes duration: 12.7 (7.3) years                                                                                                                                                                                                    |
| PRESENT, Gao 2009<br><i>China</i>                                                                                                                                                       | 12 week<br>N=11 662<br>Prospective                                                                                                  | Pre-mix insulin analogue                                              | PRESENT – total China cohort<br>Mean (SD) age: 50.0 (11.2), 54.6 (10.9), 55.7 (11.7), 57.8 (10.9) years, patients who were drug-naïve, on OADs only, on insulin only and treated with insulin +OADs, respectively<br>Mean (SD) diabetes duration: 2.9 (3.7), 5.5 (4.2), 6.4 (4.9), 7.3 (4.9) patients split by prestudy therapy: drug-naïve, OAD, insulin, insulin+OAD, respectively |
| PRESENT, Jang 2008<br><i>India, Iraq, Jordan, Kuwait, Lebanon, Qatar, Romania, Russia, Saudi Arabia, South Africa, South, Korea, Turkey, the United Arab Emirates, China, Sri Lanka</i> | 12-week<br>N=3762 (N=3414 on BOT with human insulin and N=348 on BOT with long-acting insulin analogue)<br>Retrospective assessment | Basal long-acting insulin analogue ±OADs<br>Basal NPH ±OADs           | PRESENT - patients who were previously treated with basal insulin ±OADs<br>Mean (SD) age: 56.9 (12.0), 56.8 (12.2) years, patients treated previously with analogue basal insulin and human basal insulin, respectively<br>Mean (SD) diabetes duration: 9.9 (7.2), 10.9 (7.0) years, patients treated previously with analogue basal insulin and human basal insulin, respectively   |
| PRESENT, Khutsoane 2008<br><i>India, Iraq, Jordan, Kuwait, Lebanon, Qatar, Romania, Russia, Saudi Arabia, South Africa, South, Korea, Turkey, the United Arab Emirates</i>              | 26 weeks<br>N=21 977<br>Prospective                                                                                                 | Pre-mix insulin analogue                                              | PRESENT – total study cohort<br>Mean (SD) age: 55.3 (12.2) years<br>Mean (SD) diabetes duration: 9.7 (6.8) years                                                                                                                                                                                                                                                                     |

|                                                                                                                                                                             |                                                                                                                             |                                                                       |                                                                                                                                                                                                                                           |
|-----------------------------------------------------------------------------------------------------------------------------------------------------------------------------|-----------------------------------------------------------------------------------------------------------------------------|-----------------------------------------------------------------------|-------------------------------------------------------------------------------------------------------------------------------------------------------------------------------------------------------------------------------------------|
| PRESENT, Shestakova 2007<br><i>India, Iraq, Jordan, Kuwait, Lebanon, Qatar, Romania, Russia, Saudi Arabia, South Africa, South, Korea, Turkey, the United Arab Emirates</i> | 12-week<br>N=3985<br>Retrospective assessment                                                                               | Pre-mix human insulin                                                 | PRESENT - patients who were previously treated with pre-mix human insulin<br>Mean (SD) age: 55.67 (12.61) years<br>Diabetes duration, mean (SD): 11.10 (6.88) years                                                                       |
| Progens-first step, Strojek 2008<br><i>Poland</i>                                                                                                                           | 2 periods each of 13-week duration<br>N=1384<br>Prospective, multicentre observational, conducted in the outpatient setting | Biphasic human insulin (Gensulin)                                     | Adult, mean age: 61 (9.1) years<br>Diabetes duration, mean: 63 (54) months<br>Patients with secondary failure to OADs                                                                                                                     |
| RESOLUTE<br><i>Czech Republic, Netherlands, Poland, Russia, Argentina</i>                                                                                                   | 6 months,<br>N=564<br>Prospective                                                                                           | BOT with long-acting insulin analogue                                 | Adults, mean age: 61.9 (SD=10.1) years<br>Diabetes mean duration: 9.2 (SD=5.9) years<br>Previous treatment: insulin detemir $\pm$ OADs                                                                                                    |
| SAFIR, Zick 2007<br><i>Germany</i>                                                                                                                                          | 8 weeks<br>N=479<br>Multicentre, open-label, single-arm                                                                     | Basal-bolus with long acting insulin-analogue $\pm$ OADs              | Adult, mean age: 59.2 (8.2) years<br>Diabetes duration, mean 12.7 (7.4) years<br>Prestudy therapy: NPH with mealtime insulin for at least 3 months                                                                                        |
| SOLVE, Damci 2014<br><i>Turkey</i>                                                                                                                                          | 24 weeks<br>N=2886 (N=491 in IGLar group)<br>Prospective                                                                    | BOT long-acting insulin analogue                                      | Adults, mean age in IGLar group: 56.6 (SD=10.3) years<br>Diabetes mean duration in IGLar group: 8.6 (SD=5.4) years<br>Previous treatment: oral anti-diabetic drugs                                                                        |
| SOLVE, Khunti 2012<br><i>Canada, China, Germany, Israel, Italy, Poland, Portugal, Spain, Turkey, UK</i>                                                                     | 24 weeks<br>N=17 374<br>Prospective                                                                                         | BOT long-acting analogue                                              | Adults, mean age: 62 (12) years<br>Diabetes mean duration: 10 (7) years                                                                                                                                                                   |
| Sudhakaran 2010<br><i>India</i>                                                                                                                                             | 24 weeks<br>N=124 (N=23 on BOT with NPH and N=54 on BOT with long-acting insulin analogue)<br>Retrospective                 | Basal long-acting insulin analogue $\pm$ OADs<br>Basal NPH $\pm$ OADs | Adult, mean age of insulin glargine group and NPH insulin group, respectively: 54.6 (11.1) and 53.8 (8.1) years<br>Diabetes duration, mean of insulin glargine group and NPH insulin group, respectively: 12.9 (3.9) and 10.2 (4.6) years |

|                                    |                                                                                                       |                                                                               |                                                                                                                                                                                                                                                              |
|------------------------------------|-------------------------------------------------------------------------------------------------------|-------------------------------------------------------------------------------|--------------------------------------------------------------------------------------------------------------------------------------------------------------------------------------------------------------------------------------------------------------|
| Sudhakaran 2011<br><i>India</i>    | 24 weeks<br>N=5560 (N=2743 on BOT with long-acting insulin analogue)<br>Retrospective                 | BOT with long-acting insulin analogue                                         | Adult, mean age in insulin glargine group: 54.2 (9.2) years<br>Diabetes duration, mean in insulin glargine group: 13.2 (6.7) years                                                                                                                           |
| Suzuki 2012<br><i>Japan</i>        | 1 year<br>N=400<br>Prospective                                                                        | Basal bolus with long-acting insulin analogue                                 | Adult, mean age: 65.6 (15.2) years<br>Previous therapy: NPH insulin and regular or rapidly acting bolus insulin for more than three months                                                                                                                   |
| Temizel 2010<br><i>Turkey</i>      | 1 year<br>N=140 (N=71 on pre-mix insulin analogue and N=69 on pre-mix human insulin)<br>Retrospective | Pre-mix insulin analogue<br>Pre-mix human insulin                             | Adult, mean age: 60.42 (10.86) and 60.29 (9.04) years, human analogue group and regular insulin, respectively<br>Diabetes duration at insulin start, mean: 9.82 (7.14) and 9.75 (5.62) years, human analogue group and regular insulin, respectively         |
| Tentolouris 2013,<br><i>Greece</i> | 6-12 months<br>N=301 (N=142 in IGlar group; N=159 in BHI group)<br>Retrospective                      | Basal long-acting insulin analogue $\pm$ OADs<br><br>Pre-mix human $\pm$ OADs | Adults, mean age in IGlar and BHI group, respectively: 63.2 (SD=10.1) years and 66.7 (SD=9.6) years<br>Diabetes mean duration: 13.5 (SD=7.8) years and 16.0 (SD=8.6) years<br>Previous treatment: biphasic human insulin twice daily in combination with OAD |



|                                                                                                                                                                    |                                                                                            |                                                     |                                                                                                                                                                                                                                                                                                                                                                                                                                                                                                                                 |
|--------------------------------------------------------------------------------------------------------------------------------------------------------------------|--------------------------------------------------------------------------------------------|-----------------------------------------------------|---------------------------------------------------------------------------------------------------------------------------------------------------------------------------------------------------------------------------------------------------------------------------------------------------------------------------------------------------------------------------------------------------------------------------------------------------------------------------------------------------------------------------------|
| The 1-2-3 study, Garber 2006<br><i>USA</i>                                                                                                                         | 16 weeks<br>N=193<br>Open-label,<br>observational study                                    | Pre-mix insulin<br>analogue                         | Adult, mean age of once-daily Phase 1<br>group, twice-daily Phase 2 group and thrice-<br>daily Phase 3 group, respectively: 56.7<br>(11.5), 58.0 (11.2) and 57.7 (10.2)<br>Diabetes mean duration of once-daily Phase<br>1 group, twice-daily Phase 2 group and<br>thrice-daily Phase 3 group, respectively:<br>11.1 (7.1), 12.0 (7.3) and 12.1 (7.8)<br>Previous treatment: treatment with two or<br>more OADs or treatment with one OAD and<br>a<br>basal insulin (insulin glargine or NPH insulin,<br>no more than 60 U/day) |
| UK Hypoglycaemia Study Group<br><i>UK</i>                                                                                                                          | Mean 0.73 year<br>N=383 (N=108 received<br>SU)<br>Prospective                              | Sulfonylurea                                        | Adult, mean age: 60.8 (9.3) years<br>Diabetes duration, mean: 6.0 (3.6-9.7) years                                                                                                                                                                                                                                                                                                                                                                                                                                               |
| Vexiau 2008<br><i>France</i>                                                                                                                                       | 6 months<br>N=400<br>Observational, cross-<br>sectional, multi-centre<br>study             | Sulfonylurea                                        | Adult, mean age: 62.1 (10.7) years<br>Patients treated with SU and metformin for<br>at least 6 months, insulin-naïve                                                                                                                                                                                                                                                                                                                                                                                                            |
| Yang 2012<br><i>China</i>                                                                                                                                          | 16 weeks<br>N=313<br>Multicentre, single-arm,<br>open-label study                          | BOT with long-<br>acting insulin<br>analogue        | Adult, mean age: 56.97 (8.31) years<br>Diabetes mean duration: 7.46 (2.56) years<br>Previous treatment: pre-mix insulin plus<br>OADs                                                                                                                                                                                                                                                                                                                                                                                            |
| Zjačić-Rotkvić 2012<br><i>Croatia</i>                                                                                                                              | 26 weeks<br>N=220<br>Prospective, open-label,<br>single-arm, multicentre,<br>postmarketing | Basal bolus with<br>long-acting insulin<br>analogue | Adult, mean age: 62.2 (9.2) years<br>Diabetes duration: 13.9 (7.6) years<br>Previous therapy: inadequate glycaemic<br>control with pre-mix insulin                                                                                                                                                                                                                                                                                                                                                                              |
| <sup>a</sup> Only groups included in the review are described unless data were provided only for a total study cohort. Means are presented with SD (if available). |                                                                                            |                                                     |                                                                                                                                                                                                                                                                                                                                                                                                                                                                                                                                 |
